# Supplementary material for: The French Cohort of DNA Repair-Deficient Xeroderma Pigmentosum Patients: Risk of Hematological Malignancies
Source: MDPI journal article supplement (doi:10.3390/cancers15102706), 2023-05-10
Supplement: s1 [file s1]

## Supplementary Materials

### The French Cohort of DNA Repair-Deficient Xeroderma Pigmentosum Patients: Risk of Hematological Malignancies

**Alain Sarasin, PhD**

UMR9019 CNRS, Gustave Roussy institute,  
Villejuif, France  
alain.sarasin@gustaveroussy.fr

**Table S1: Clinical and genetic description of the 181 patients of the French cohort**

| Patient's code | Countries of family's origin | Sex | Ages in 2023 (years) | Ages at last seen (years) | Ages at death (years) | XP group | XP gene mutations | Clinical information                         |
|----------------|------------------------------|-----|----------------------|---------------------------|-----------------------|----------|-------------------|----------------------------------------------|
| XP10VI*        | Morocco                      | M   |                      |                           | 28                    | XP-C     | delTG             | AML-4 (27y); Death after chemotherapy at 28. |
| XP11VI*        | Morocco                      | M   |                      |                           | 25                    | XP-C     | delTG             | Death of malignant melanoma.                 |
| XP14VI         | French                       | M   |                      |                           | 13                    | XP-D     |                   | XP-D/Cockayne Syndrome (CS)                  |
| XP22VI         | North Africa                 | F   |                      | 18                        |                       | XP-C     | delTG             |                                              |
| XP31VI*        | Algeria                      | F   |                      | 26                        |                       | XP-C     |                   |                                              |
| XP32VI*        | Algeria                      | F   |                      | 18                        |                       | XP-C     |                   |                                              |

|          |              |   |    |    |    |      |                                 |                                                           |
|----------|--------------|---|----|----|----|------|---------------------------------|-----------------------------------------------------------|
| XP34VI** | Gabon        | M |    | 31 |    | XP-C |                                 |                                                           |
| XP36VI** | Gabon        | M |    | 33 |    | XP-C |                                 |                                                           |
| XP51VI   | Algeria      | M |    | 46 |    | XP-V | c.1075_1244del; c.1091_1092insC |                                                           |
| XP56VI   | Tunisia      | F |    |    | 52 | XP-V | c.1075_1244del; c.1091_1092insC |                                                           |
| XP62VI   | Algeria      | M |    | 33 |    | XP-V | c.1075_1244del                  |                                                           |
| XP70VI   | Tunisia      | M |    | 38 |    | XP-C |                                 |                                                           |
| XP71VI   | Algeria      | M |    |    | 14 | XP-C | delTG                           | Death of malignant melanoma.                              |
| XP75VI   | Algeria      | M |    | 43 |    | XP-V | c.1091_1092insC                 |                                                           |
| XP78VI   | Morocco      | M |    | 12 |    | XP-C |                                 |                                                           |
| XP81VI*  | Tunisia      | M |    |    | 24 | XP-C | delTG                           | Death of malignant melanoma.                              |
| XP82VI*  | Tunisia      | M |    |    | 18 | XP-C | delTG                           | AML-6 (16y); HSCT (17y); Death of toxicity.               |
| XP86VI   | Algeria      | M |    | 53 |    | XP-V | c.1561C>T                       |                                                           |
| XP90VI   | Tunisia      | F |    | 24 |    | XP-C | delTG                           |                                                           |
| XP92VI   | North Africa | M |    | 27 |    | XP-C |                                 |                                                           |
| XPAIHaVI | Tunisia      | M |    |    | 25 | XP-C | delTG                           | Death of AML.                                             |
| XP93VI*  | Tunisia      | M | 44 |    |    | XP-C | del TG                          |                                                           |
| XP251VI* | Tunisia      | M | 32 |    |    | XP-C | delTG                           |                                                           |
| XP252VI* | Tunisia      | M | 31 |    |    | XP-C | delTG                           |                                                           |
| XP107VI  | North Africa | F |    |    | 17 | XP-C |                                 |                                                           |
| XP114VI  | Algeria      | F |    | 19 |    | XP-C |                                 |                                                           |
| XP115VI  | North Africa | F |    |    | 25 | XP-C |                                 | Death of malignant melanoma.                              |
| XP119VI  | Algeria      | F |    |    | 21 | XP-C |                                 |                                                           |
| XP127VI  | French       | M |    |    | 57 | XP-V | c.1093dupC                      |                                                           |
| XP128VI  | North Africa | F |    |    | 16 | XP-C | delTG                           | Leukemia (15y); Death following chemotherapy.             |
| XP131VI  | French       | M |    |    | 47 | XP-D |                                 |                                                           |
| XP134VI  | North Africa | F |    | 18 |    | XP-C |                                 |                                                           |
| XP146VI  | French       | F |    | 20 |    | XP-V |                                 |                                                           |
| XP148VI  | Algeria      | F |    |    | 19 | XP-C | del TG                          | Poorly-differentiated follicular thyroid carcinoma (13y). |
| XP155VI  | USA          | M |    |    | 42 | XP-V |                                 | Death of T-lymphoma following chemotherapy.               |
| XP159VI  | French       | F | 44 |    |    | XP-E | c.550G>C                        |                                                           |
| XP162VI  | Mauritania   | M |    | 17 |    | XP-A |                                 | XPA/CS syndrome.                                          |
| XP163VI  | Tunisia      | F |    | 22 |    | XP-C |                                 |                                                           |
| XP165VI  | Morocco      | F |    |    | 25 | XP-C | delTG                           | Kidney adenocarcinoma (23y).                              |
| XP166VI  | North Africa | F |    |    | 31 | XP-C |                                 |                                                           |

|            |              |   |    |    |    |      |                              |                                                  |
|------------|--------------|---|----|----|----|------|------------------------------|--------------------------------------------------|
| XP167VI    | Algeria      | M |    |    | 26 | XP-C | delTG                        | Trisomy 21; MDS (25y); Death of AML.             |
| XP185VI    | Spain        | F |    |    | 25 | XP-C | delTG                        | MDS (24y); Death of AML.                         |
| XP188VI*   | Algeria      | F | 25 |    |    | XP-C | delTG                        |                                                  |
| XP189VI*   | Algeria      | M | 22 |    |    | XP-C | delTG                        |                                                  |
| XP204VI**  | French       | M |    |    | 29 | XP-D | c.2125C>T                    | Death of neurological disorders                  |
| XP205VI**  | French       | M |    |    | 32 | XP-D | c.2125C>T                    | Death of neurological disorders                  |
| XP208VI    | Algeria      | M |    |    | 17 | XP-C | delTG                        | Mediastinal lymphoma (8y).                       |
| XP233VI*   | Tunisia      | M |    |    | 8  | XP-C | delTG                        | Death of anaplastic astrocytoma.                 |
| XP241VI*   | Tunisia      | F | 30 |    |    | XP-C | delTG                        |                                                  |
| XP433VI*   | Tunisia      | M | 25 |    |    | XP-C | delTG                        |                                                  |
| XP235VI    | Tunisia      | F |    |    | 29 | XP-C | delTG                        | MDS (24); Death of AML-6.                        |
| XP250VI    | North Africa | F | 32 |    |    | XP-C |                              |                                                  |
| XP256VI    | French       | F |    | 48 |    | XP-V | c.907C>T; c.1222_1225delACTT |                                                  |
| XP261VI*   | French       | F | 31 |    |    | XP-D | c.2125C>T; c.1925G>C         |                                                  |
| XP266VI*   | French       | F | 27 |    |    | XP-D | c.2125C>T; c.1925G>C         |                                                  |
| XP268VI    | Greece       | F | 34 |    |    | XP-C | c.779+1_14del12              |                                                  |
| XP269VI    | Morocco      | F |    |    | 23 | XP-C | delTG                        | Cervical tumor (18y).                            |
| XP302VI    | French       | M |    | 20 |    | XP-C |                              |                                                  |
| XP309VI    | Morocco      | F |    |    | 10 | XP-C | delTG                        | B-ALL (7y); Death of MDS following chemotherapy. |
| XP314VI*** | French       | M | 30 |    |    | XP-C | c.1243C>T; c.1704T>A         |                                                  |
| XP315VI*** | French       | M | 30 |    |    | XP-C | c.1243C>T; c.1704T>A         |                                                  |
| XP330VI    | French       | M | 50 |    |    | XP-C |                              |                                                  |
| XP373VI    | Algeria      | F |    | 14 |    | XP-C | delTG                        |                                                  |
| XP401VI    | French       | M | 27 |    |    | XP-A |                              |                                                  |
| XP415VI    | Tunisia      | M |    | 29 |    | XP-D | c.1802G>T                    |                                                  |
| XP420VI*   | Morocco      | F |    |    | 25 | XP-C | delTG                        | Death of cutaneous lymphoma NK.                  |
| XP423VI*   | Morocco      | F |    | 36 |    | XP-C | delTG                        |                                                  |
| XP422VI    | French       | F | 74 |    |    | XP-V | c.907C>T; c.1222_1225delACTT |                                                  |
| XP424VI    | North Africa | M | 43 |    |    | XP-V |                              |                                                  |
| XP435VI*   | Algeria      | M |    | 9  |    | XP-A | c.682C>T                     |                                                  |
| XP436VI*   | Algeria      | F |    | 18 |    | XP-A | c.682C>T                     |                                                  |
| XP440VI    | Brazil       | F | 34 |    |    | XP-G | c.83C>A; c.2904G>C           |                                                  |
| XP442VI    | North Africa | F |    | 30 |    | XP-D | c.1802G>T                    |                                                  |
| XP456VI*   | North Africa | F | 47 |    |    | XP-A | IVS4 C.609-2 A>G             |                                                  |

|          |              |   |    |    |      |                            |                                                                                                          |
|----------|--------------|---|----|----|------|----------------------------|----------------------------------------------------------------------------------------------------------|
| XP457VI* | North Africa | M | 40 |    | XP-A | IVS4 C.609-2 A>G           |                                                                                                          |
| XP463VI  | Algeria      | F |    | 9  | XP-C |                            |                                                                                                          |
| XP475VI* | Algeria      | M | 23 |    | XP-C |                            |                                                                                                          |
| XP476VI* | Algeria      | F | 20 |    | XP-C |                            |                                                                                                          |
| XP480VI  | Morocco      | F | 29 |    | XP-C | delTG                      |                                                                                                          |
| XP486VI  | French       | F | 72 |    | XP-V | c.907C>T                   |                                                                                                          |
| XP491VI  | Tunisia      | M | 78 |    | XP-D | c.1880G>T                  |                                                                                                          |
| XP492VI  | Algeria      | M | 59 |    | XP-D | c.1802G>T                  |                                                                                                          |
| XP538VI  | Algeria      | M |    | 29 | XP-C | delTG                      | Death of AML-2.                                                                                          |
| XP546VI  | Tunisia      | M | 37 |    | XP-V | c.1091_1092insC            |                                                                                                          |
| XP551VI  | French       | F | 35 |    | XP-C | c.2089_2090insTGG          |                                                                                                          |
| XP552VI* | French       | M |    | 39 | XP-D | R683W + del Ex 3           |                                                                                                          |
| XP553VI* | French       | M |    | 36 | XP-D | R683W + del Ex 3           |                                                                                                          |
| XP574VI  | North Africa | M | 31 |    | XP-V |                            |                                                                                                          |
| XP603VI  | French       | F | 75 |    | XP-V | c.1727_1728delCT; c.883G>A |                                                                                                          |
| XP606VI* | French       | F | 53 |    | XP-V | c.1727_1728delCT; c.883G>A |                                                                                                          |
| XP737VI* | French       | F | 57 |    | XP-V | c.1727_1728delCT; c.883G>A |                                                                                                          |
| XP612VI  | Algeria      | F | 24 |    | XP-C | delTG                      |                                                                                                          |
| XP627VI  | French       | M | 42 |    | XP-D | L461V + del 716-730        |                                                                                                          |
| XP629VI  | North Africa | M | 26 |    | XP-C | delTG                      | Thyroid nodules                                                                                          |
| XP664VI* | Tunisia      | M |    | 10 | XP-C | delTG                      | Death of astrocytoma.                                                                                    |
| XP665VI* | Tunisia      | F | 8  |    | XP-C | delTG                      |                                                                                                          |
| XPAdSaVI | Morocco      | M |    | 19 | XP-C | delTG                      | Cerebellar astrocytoma (14y).                                                                            |
| XP673VI  | Morocco      | F |    | 22 | XP-C | delTG                      | Death of T-ALL.                                                                                          |
| XP689VI  | Morocco      | F | 22 |    | XP-A | IVS4 C.609-2 A>G           |                                                                                                          |
| XP694VI  | North Africa | F | 21 |    | XP-C | delTG                      | Left Ovarian juvenile granulosa-cell tumor at 19y<br>and right ovarian Sertoli-Leydig cell tumor at 19y. |
| XP695VI  | French       | F | 82 |    | XP-C | c.2108C>T; c.2544delA      | The oldest XP-C patient in our cohort.                                                                   |
| XP700VI* | Morocco      | F | 26 |    | XP-A | c.682C>T                   |                                                                                                          |
| XP701VI* | Morocco      | F | 20 |    | XP-A | c.682C>T                   |                                                                                                          |
| XP704VI  | French       | F | 44 |    | XP-C | c.1243C>T; c.1399C>T       |                                                                                                          |
| XP719VI* | Morocco      | F |    | 17 | XP-A | IVS4 C.609-2 A>G           | Death of fulminant hepatitis.                                                                            |
| XP851VI* | Morocco      | M | 16 |    | XP-A | IVS4 C.609-2 A>G           |                                                                                                          |
| XP731VI  | North Africa | M | 43 |    | XP-C | delTG                      |                                                                                                          |

|           |              |   |    |    |      |                            |                                                           |
|-----------|--------------|---|----|----|------|----------------------------|-----------------------------------------------------------|
| XP744VI   | French       | M | 20 |    | XP-C | c.463C>T; c.2287delC       |                                                           |
| XP757VI   | French       | M |    | 20 | XP-D |                            | Hodgkin Disease (20y). Death following chemotherapy.      |
| XP769VI*  | North Africa | M | 23 |    | XP-C | delTG                      |                                                           |
| XP81bVI*  | North Africa | M | 20 |    | XP-C | delTG                      |                                                           |
| XP783VI   | North Africa | M | 21 |    | XP-A | c.682C>T                   |                                                           |
| XP791VI   | North Africa | M | 19 |    | XP-C | delTG                      | A germline mutation on <i>MEN1</i> gene.                  |
| XP798VI*  | North Africa | F | 19 |    | XP-C | delTG                      |                                                           |
| XP855VI*  | North Africa | M | 17 |    | XP-C | delTG                      |                                                           |
| AS802VI   | Algeria      | M | 33 |    | XP-C | delTG                      | Poorly-differentiated follicular thyroid carcinoma (20y). |
| XP819VI   | French       | M | 73 |    | XP-V | c.1727_1728delCT; c.883G>A | Prostate tumor at 60y.                                    |
| XP820VI*  | North Africa | F | 19 |    | XP-C | delTG                      | MDS/AML in January 2023 waiting for HSCT.                 |
| XP821VI*  | North Africa | F | 21 |    | XP-C | delTG                      |                                                           |
| XP822VI   | Spain        | F | 18 |    | XP-D | c.1867_1868insG; c.2164C>T | Syndrome XPD/TTD.                                         |
| XP826VI   | North Africa | M | 19 |    | XP-C | delTG                      |                                                           |
| XP843VI   | North Africa | M |    | 22 | XP-V | c.797T>A                   |                                                           |
| XP853VI   | North Africa | M |    | 36 | XP-V | c.278G>C                   |                                                           |
| XP858VI   | Morocco      | F |    | 13 | XP-A | c.682C>T                   |                                                           |
| XP860VI   | North Africa | F |    | 29 | XP-C | c.658C>T                   | Death of malignant melanoma of the face.                  |
| XP865VI   | North Africa | M | 32 |    | XP-V |                            |                                                           |
| XP871VI   | Australia    | F |    | 9  | XP-F | R589W + del Ex 3 31 nt     |                                                           |
| XP872VI   | Kosovo       | F | 40 |    | XP-V | c.2074A>G; c.2141A>G       |                                                           |
| XP874     | Australia    | M | 16 |    | XP-D | c.1484T>C; c.1775G>C       | Syndrome XPD/TTD.                                         |
| XP879VI   | North Africa | M | 27 |    | XP-C | C.1103_1104delAA; delTG    |                                                           |
| XP888VI*  | North Africa | M | 36 |    | XP-V | c.672delA; IVS1+1G>C       |                                                           |
| XP968VI*  | North Africa | F | 43 |    | XP-V | c.672delA; IVS1+1G>C       |                                                           |
| XP892VI   | North Africa | M | 18 |    | XP-C | delTG                      |                                                           |
| XP893VI   | North Africa | M | 18 |    | XP-C | delTG                      |                                                           |
| XP922VI   | French       | M | 15 |    | XP-C |                            |                                                           |
| XP924VI*  | Morocco      | M |    | 15 | XP-C | delTG                      | T-ALL (12y); MDS (13y); Death of AML-6.                   |
| XPEsAdVI* | Morocco      | M | 18 |    | XP-C | delTG                      |                                                           |
| XP934VI   | French       | F | 14 |    | XP-C | c.658C>T; c.1243C>T        |                                                           |
| XP961VI   | French       | F | 55 |    | XP-V | c.437dupA                  |                                                           |
| XP964VI   | French       | F | 53 |    | XP-E |                            |                                                           |
| XP965VI   | North Africa | F | 55 |    | XP-V | c.907C>T                   |                                                           |

|             |              |   |    |    |      |                            |                                                                                   |
|-------------|--------------|---|----|----|------|----------------------------|-----------------------------------------------------------------------------------|
| XP966VI*    | French       | F |    | 88 | XP-V | c.108_110del3              |                                                                                   |
| XP967VI*    | French       | F | 74 |    | XP-V | c.108_110del3              |                                                                                   |
| XP2003VI*** | Algeria      | F | 28 |    | XP-C | delTG                      | Vaginal embryonal rhabdomyosarcoma at 16y.                                        |
| XP2004VI*** | Algeria      | F |    | 23 | XP-C | delTG                      | Vaginal rhabdomyosarcoma at 16y and death of AML.                                 |
| XP2006VI*   | Morocco      | F | 34 |    | XP-C | delTG                      | AML-6 (29y); HSCT (29y).                                                          |
| XPToMoVI*   | Morocco      | M | 29 |    | XP-C | delTG                      |                                                                                   |
| XPBoMoVI    | North Africa | M | 32 |    | XP-C |                            |                                                                                   |
| XPBoNaVI    | North Africa | F | 31 |    | XP-C |                            |                                                                                   |
| XPGAVI      | French       | F |    | 54 | XP-V | c.1727_1728delCT; c.883G>A | Gastric tumor (48y).                                                              |
| XPChFaVI    | North Africa | M | 28 |    | XP-C | delTG                      |                                                                                   |
| XPAHVI      | Tunisia      | M |    | 25 | XP-C | delTG                      | AML (24y). Curietherapy (24y). Death at 25.                                       |
| XPChFa2VI   | North Africa | M |    | 24 | XP-C |                            | Death of leukemia.                                                                |
| XPCoJoVI    | French       | F | 29 |    | XP-C |                            |                                                                                   |
| XPMoAbVI    | North Africa | M | 35 |    | XP-C |                            |                                                                                   |
| XPBeDeVI    | North Africa | F | 11 |    | XP-C |                            |                                                                                   |
| XPBoIlVI    | North Africa | M | 17 |    | XP-D | c.A254G                    |                                                                                   |
| XP2020VI    | Tunisia      | F | 14 |    | XP-C | delTG; c.G850T             | Ovarian Sertoli-Leydig cell tumor (11y).                                          |
| XPDuMeVI    | North Africa | F | 18 |    | XP-C |                            |                                                                                   |
| XPRaWaVI*   | North Africa | M | 10 |    | XP-C | delTG                      |                                                                                   |
| XPRaYaVI*   | North Africa | F | 13 |    | XP-C | delTG                      |                                                                                   |
| XPAAVI      | Algeria      | F | 29 |    | XP-C | delTG                      | Papillary thyroid carcinomas (17y) and pancreatic tumor (29y) under chemotherapy. |
| XPElHaVI*   | North Africa | F |    | 22 | XP-C | delTG                      | Ovarian sarcoma (18y).                                                            |
| XPElKaVI*   | North Africa | F |    | 28 | XP-C | delTG                      | Uterine adenomyosarcoma (15y). Death at 28.                                       |
| XPMaAbVI    | Morocco      | M | 22 |    | XP-C | delTG                      | AML-3 (14y).                                                                      |
| XPGaViVI*   | Algeria      | F |    | 25 | XP-C | delTG                      | Death of RAEB-2.                                                                  |
| XPGaMVI*    | Algeria      | M |    | 27 | XP-C | delTG                      | Death of RAEB-t.                                                                  |
| XP1BEVI     | Belgium      | M | 27 |    | XP-V |                            |                                                                                   |
| XPWaVI      | Pakistan     | M | 33 |    | XP-C | c.1243C>G; c.1934delC      | Angiosarcoma of the inner canthus of the left eye (22y).                          |
| XPAblLyVI   | North Africa | F | 28 |    | XP-C |                            |                                                                                   |
| XP844VI     | Comoros      | M | 19 |    | XP-C | IVS 12-1G>C                |                                                                                   |
| XP845VI*    | Comoros      | M | 27 |    | XP-C | IVS 12-1G>C                |                                                                                   |
| XPMYVI*     | Comoros      | F |    | 30 | XP-C | IVS 12-1G>C                | Death of breast tumor at 30y.                                                     |
| XP936VI     | Comoros      | M | 22 |    | XP-C | IVS 12-1G>C                |                                                                                   |

|          |         |   |    |    |      |             |                              |
|----------|---------|---|----|----|------|-------------|------------------------------|
| XPYolsVI | Comoros | M | 25 |    | XP-C | IVS 12-1G>C |                              |
| XPMa01VI | Comoros | F | 31 |    | XP-C | IVS 12-1G>C |                              |
| XPMa02VI | Comoros | M | 24 |    | XP-C | IVS 12-1G>C |                              |
| XPMa14VI | Comoros | M | 22 |    | XP-C | IVS 12-1G>C |                              |
| XPMa06VI | Comoros | F |    | 32 | XP-C | IVS 12-1G>C | Death of malignant melanoma. |
| XPMa09VI | Comoros | F | 21 |    | XP-C | IVS 12-1G>C |                              |
| XPBANaVI | Comoros | F | 21 |    | XP-C | IVS 12-1G>C | Trichoblastoma.              |

- (\*) or (\*\*): siblings of the closest XP patient in the list; (\*\*\*): twins.
- HSCT: hematopoietic stem cell transplant; RAEB; refractory anemia with excess blasts.
- delTG means c.1643\_1644 delTG; p.Val548AlafsX572 *XPC* mutation.
- CS means Cockayne Syndrome which is a DNA repair-deficient disease with neurological abnormalities and early aging but no increased risk of tumors.
- TTD means trichothiodystrophy which is a DNA repair-deficient disease with neurological abnormalities but no increased risk of tumors.
